# Supplementary material for: Facile and Sensitive Detection of Nitrogen-Containing Organic Bases with Near Infrared C-Dots Derived Assays
Source: MDPI journal article supplement (doi:10.3390/nano11102607), 2021-10-03
Supplement: s1 [file s1]

# Facile and Sensitive Detection of Nitrogen-Containing Organic Bases with Near Infrared C-Dots Derived Assays

Chunyu Ji <sup>1</sup>, Yiqun Zhou <sup>2</sup>, Wenquan Shi <sup>1</sup>, Jiajia Wu <sup>1</sup>, Qiurui Han <sup>1</sup>, Tianshu Zhao <sup>1</sup>, Roger M. Leblanc <sup>2</sup> and Zhili Peng <sup>1,\*</sup>

1. National Center for International Research on Photoelectric and Energy Materials, School of Materials and Energy, Yunnan University, Kunming 650091, China; jichunyu@mail.ynu.edu.cn (C.J.); shiwenquan1010@163.com (W.S.); 12019101477@mail.ynu.edu.cn (J.W.); hqr3155064793@163.com (Q.H.); zhaotianshu@mail.ynu.edu.cn (T.Z.)
2. Department of Chemistry, University of Miami, 1301 Memorial Drive, Coral Gables, FL 33146, USA; yxz431@miami.edu (Y.Z.); rml@miami.edu (R.M.L.)
3. Correspondence: zhilip@ynu.edu.cn; Tel.: +86-871-65037399

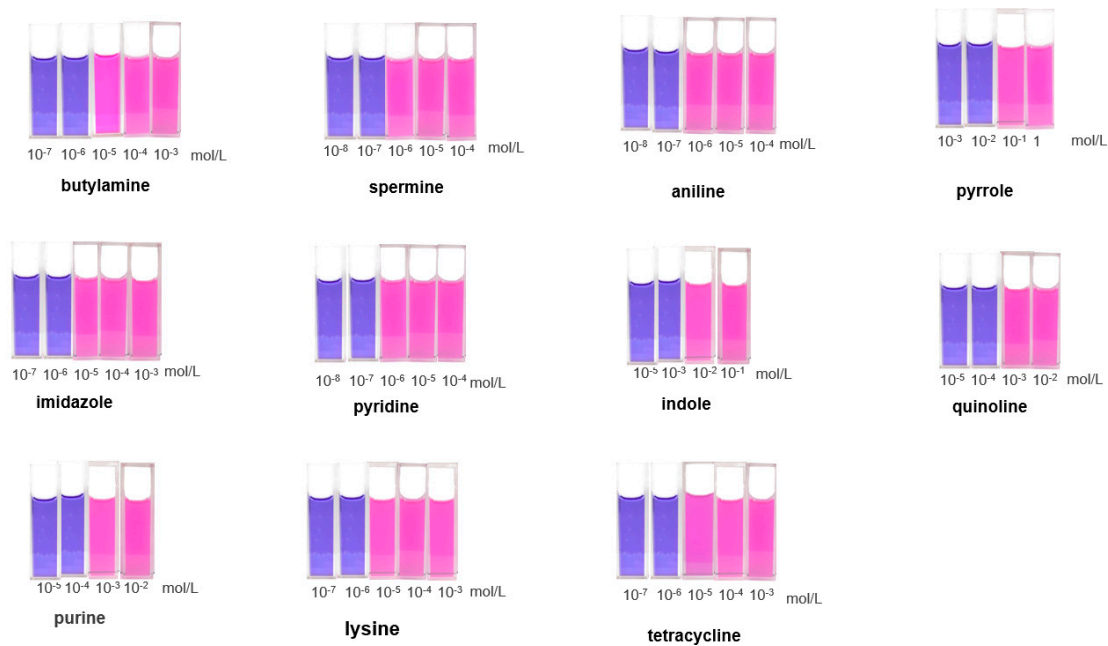

**Figure S1.** Solution assays for the detection of nitrogen-containing organic bases (NCOBs)

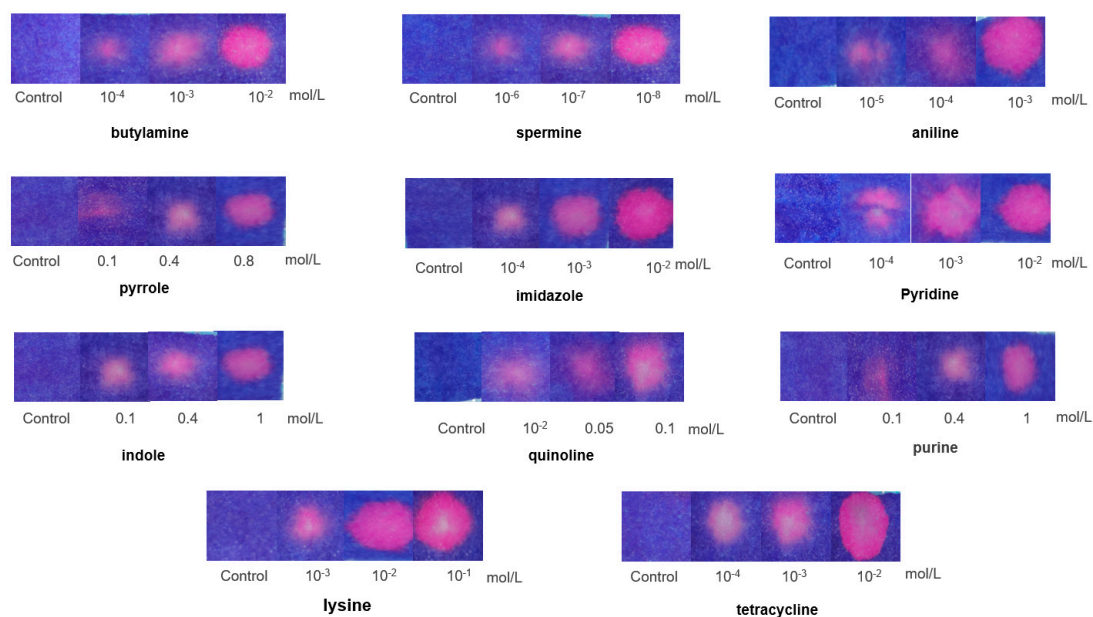

**Figure S2.** Test paper assays for the detection of NCOBs

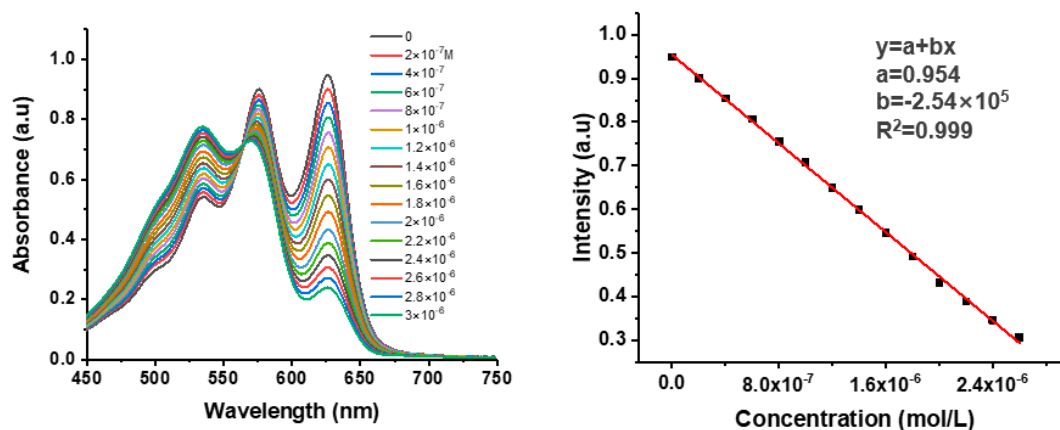

Figure S3. Detection of butylamine using UV-vis absorption-based sensing assay

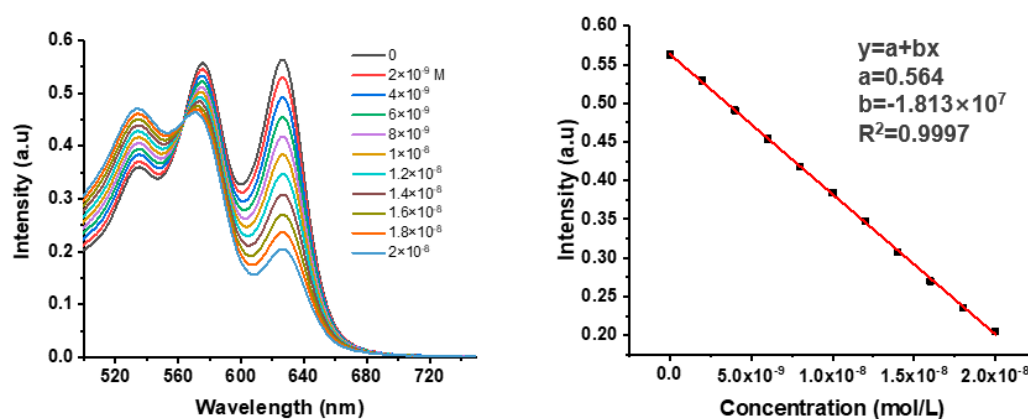

Figure S4. Detection of spermine using UV-vis absorption-based sensing assay

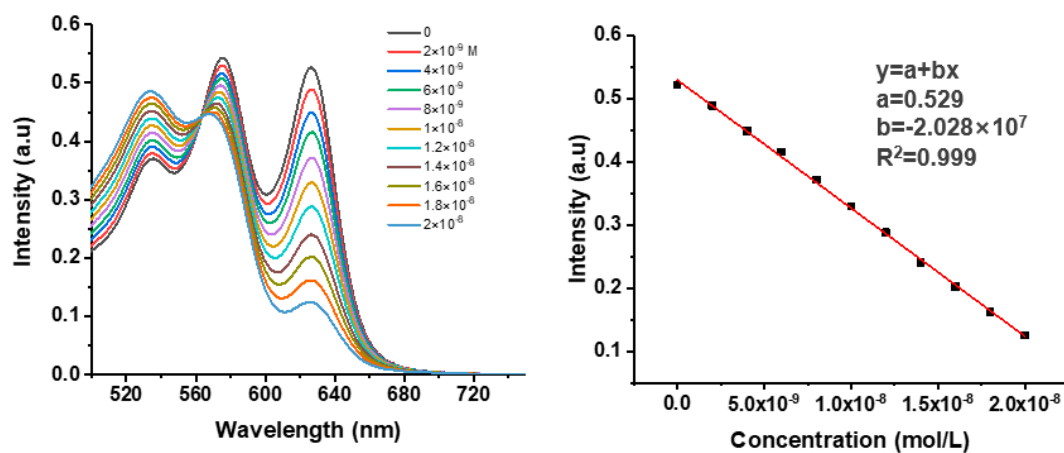

Figure S5. Detection of aniline using UV-vis absorption-based sensing assay

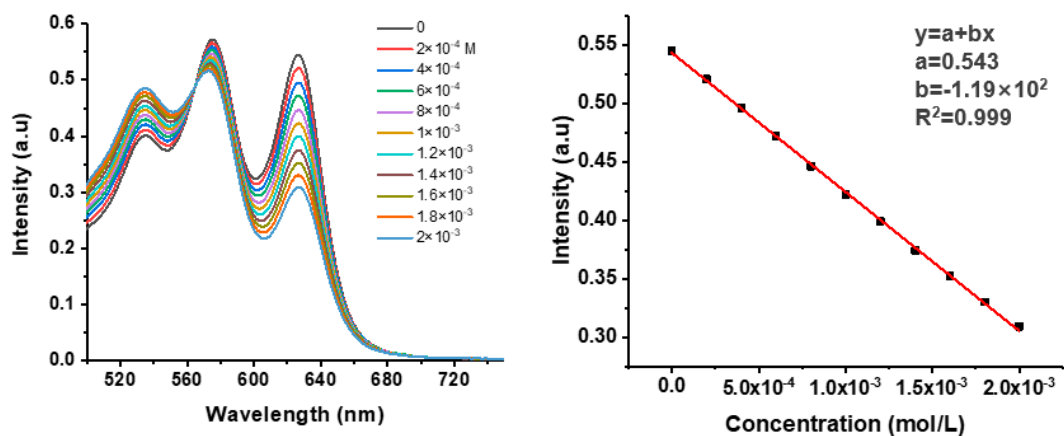

Figure S6. Detection of pyrrole using UV-vis absorption-based sensing assay

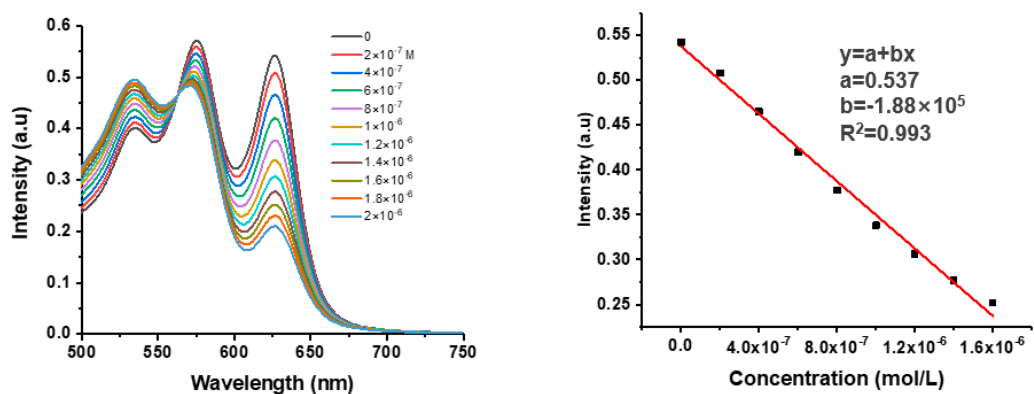

Figure S7. Detection of imidazole using UV-vis absorption-based sensing assay

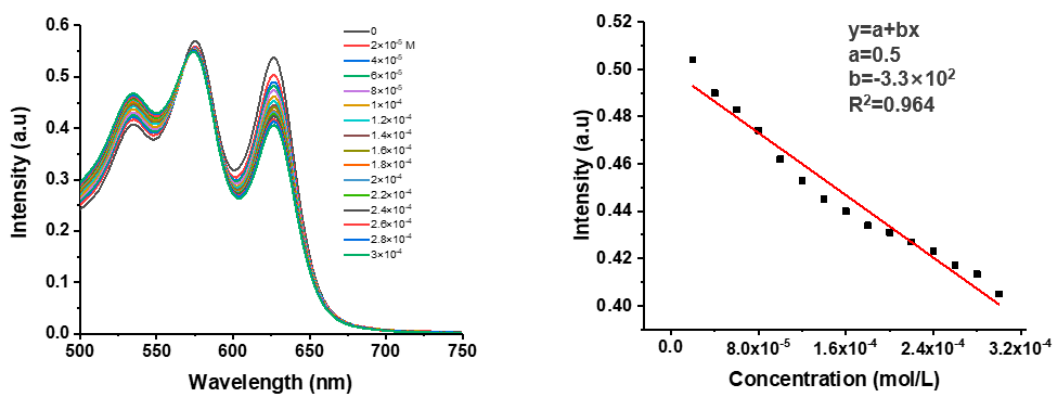

Figure S8. Detection of purine using UV-vis absorption-based sensing assay

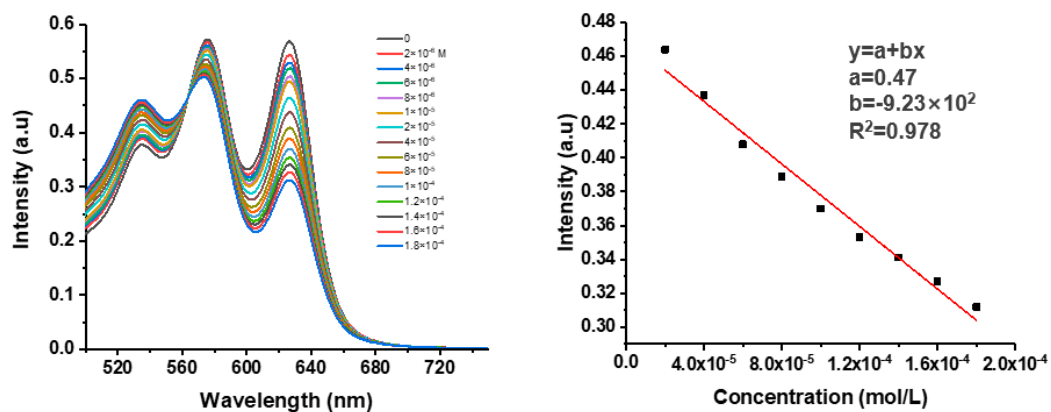

Figure S9. Detection of quinoline using UV-vis absorption-based sensing assay

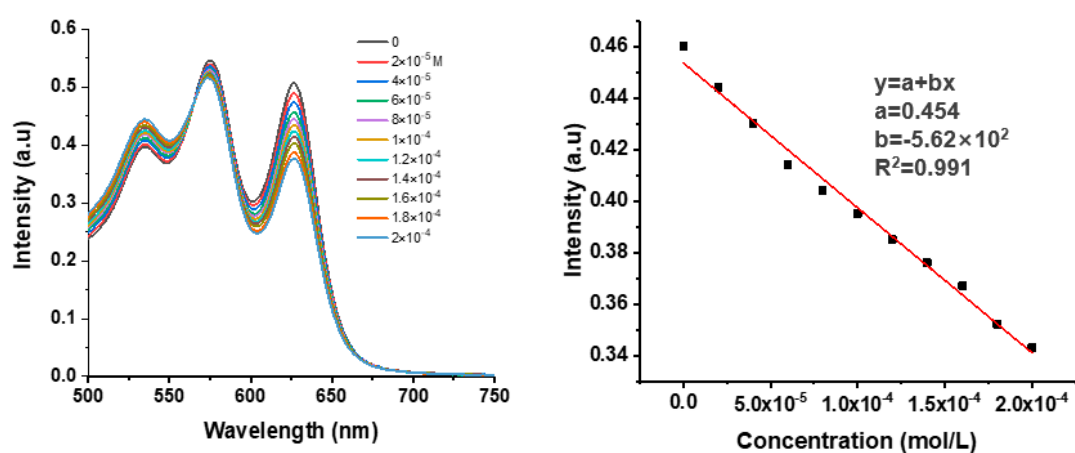

Figure S10. Detection of indole using UV-vis absorption-based sensing assay

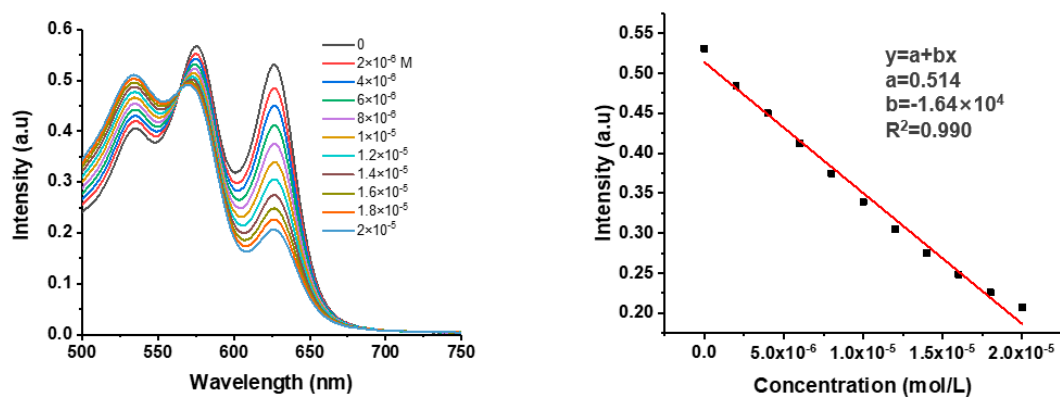

Figure S11. Detection of tetracycline using UV-vis absorption-based sensing assay

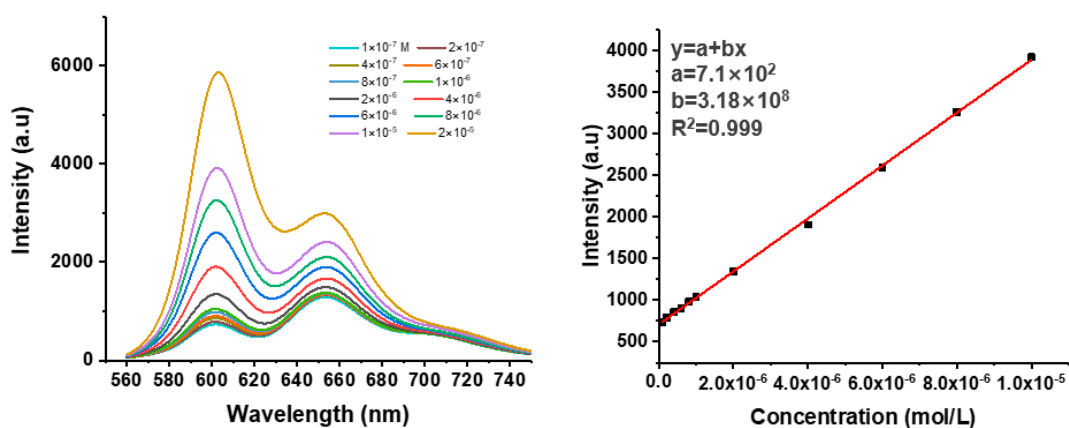

Figure S12. Detection of butylamine using PL-based sensing assay

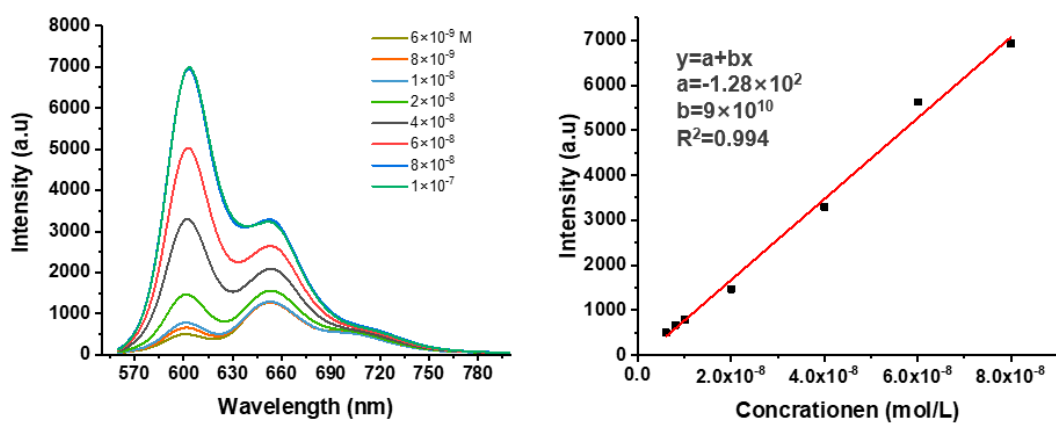

Figure S13. Detection of spermine using PL-based sensing assay

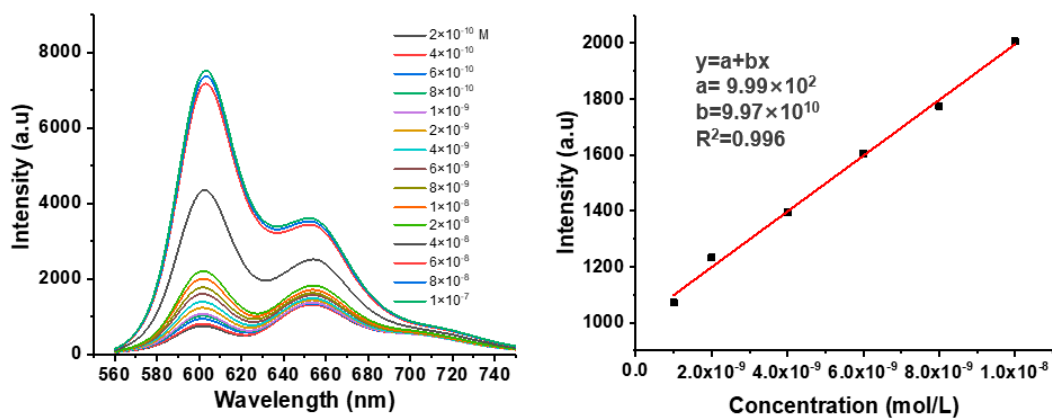

Figure S14. Detection of aniline using PL-based sensing assay

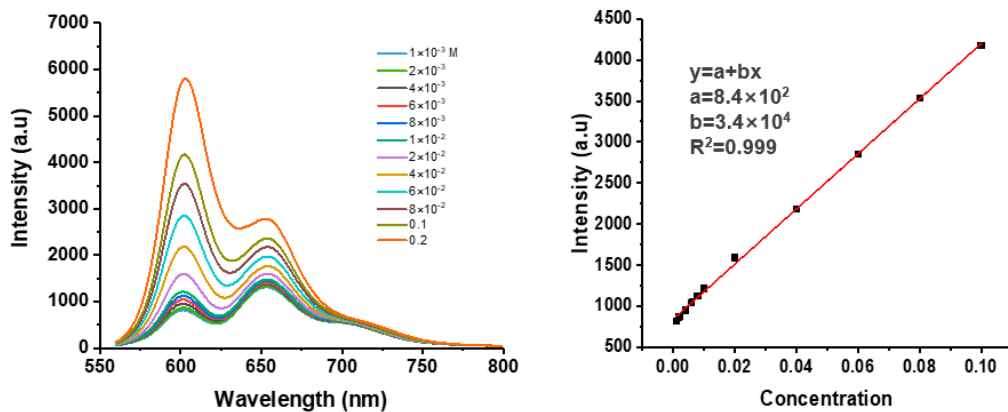

Figure S15. Detection of pyrrole using PL-based sensing assay

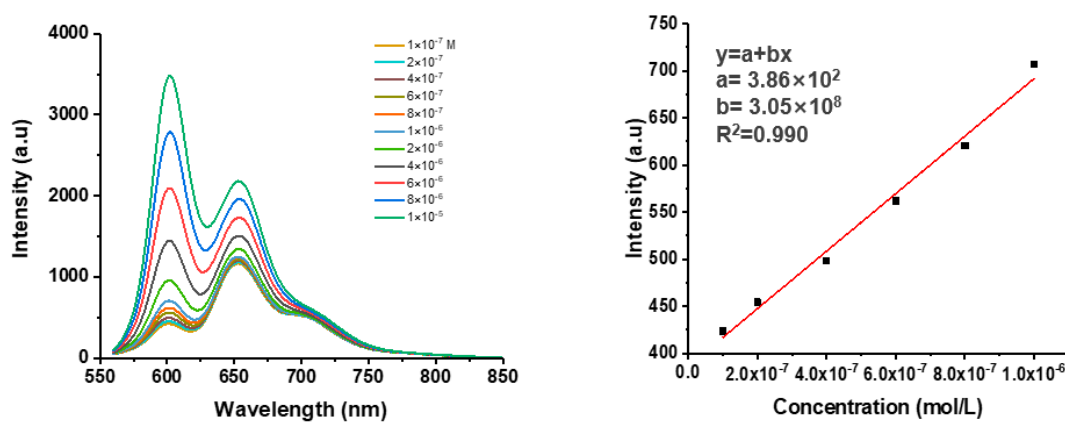

Figure S16. Detection of imidazole using PL-based sensing assay

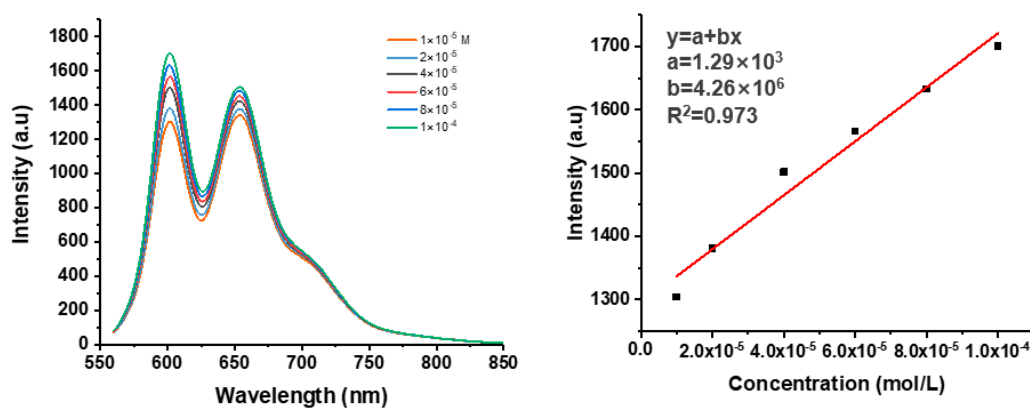

Figure S17. Detection of purine using PL-based sensing assay

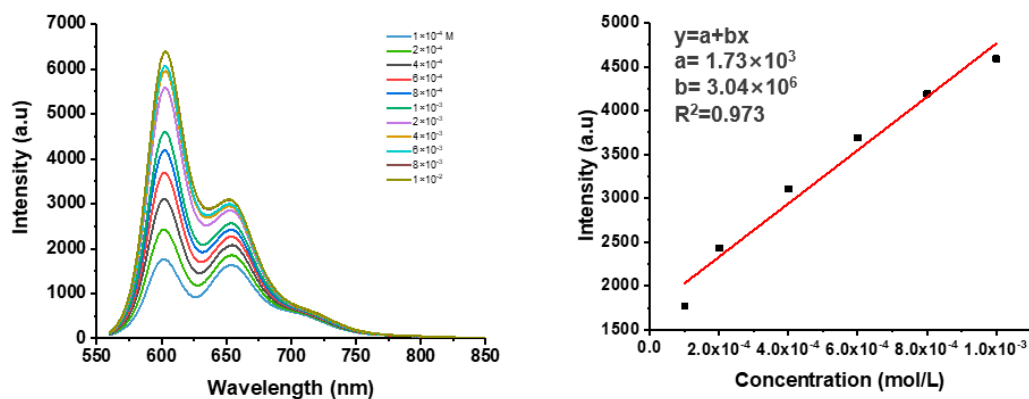

Figure S18. Detection of quinoline using PL-based sensing assay

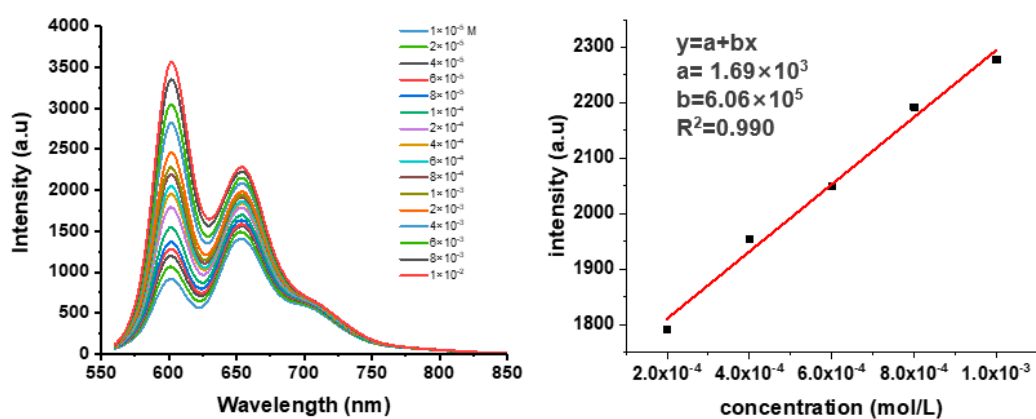

Figure S19. Detection of indole using PL-based sensing assay

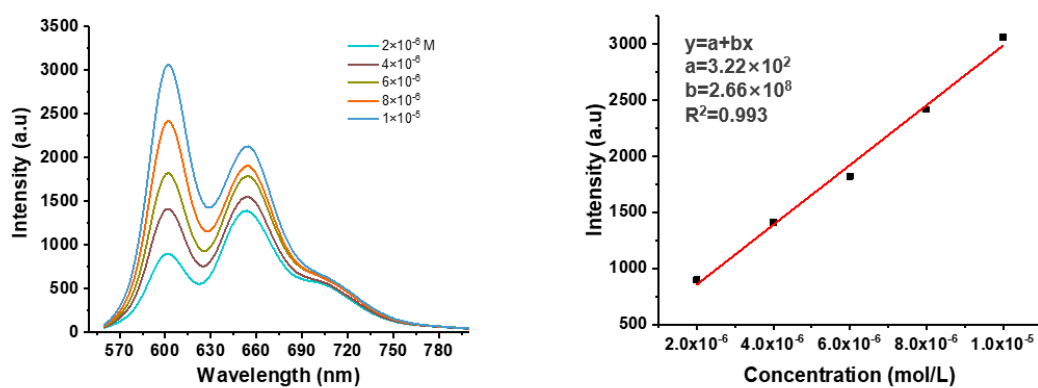

Figure S20. Detection of tetracycline using PL-based sensing assay



**Table S1.** Summary of differences between calculated values and the actual values in percentage (Diff. %) of UV-vis absorption- and PL-based assays for the detection of various NCOBs

| NCOBs <sup>a</sup> | Diff. % (UV-Vis) |         |         | Diff. % (PL) |        |        |
|--------------------|------------------|---------|---------|--------------|--------|--------|
| butylamine         | 0.4 uM           | 1.4 uM  | 2.2 uM  | 0.15uM       | 5.0 uM | 9 uM   |
|                    | 1.6%             | 0.6%    | 0.8%    | 9.7%         | 5%     | 0.4%   |
| spermine           | 3 nM             | 9 nM    | 17 nM   | 7 nM         | 25 nM  | 70 nM  |
|                    | 1.1%             | 0.7%    | 0.9%    | 1.2%         | 4.4%   | 1.8%   |
| aniline            | 3 nM             | 11 nM   | 17 nM   | 1.5 nM       | 5 nM   | 9 nM   |
|                    | 3.6%             | 0.9%    | 3.8%    | 8.9%         | 2.7%   | 7%     |
| pyrrole            | 0.3 mM           | 1.1 mM  | 1.7 mM  | 1.5 mM       | 50 mM  | 90 mM  |
|                    | 3.7%             | 0.7%    | 1.2%    | 9.7%         | 3.8%   | 4.8%   |
| imidazole          | 0.3 uM           | 0.9 uM  | 1.5 uM  | 0.15 uM      | 5 uM   | 9 uM   |
|                    | 1.1%             | 0.7%    | 3.4%    | 4.5%         | 6.2%   | 4.7%   |
| pyridine           | 3 nM             | 9 nM    | 17 nM   | 1.5 nM       | 25 nM  | 50 nM  |
|                    | 3.9%             | 0.26%   | 2.3%    | 9.8%         | 8.3%   | 2.2%   |
| purine             | 0.05 mM          | 0.15 mM | 0.27 mM | 15 uM        | 50 uM  | 90 uM  |
|                    | 5.8%             | 8.9%    | 8.3%    | 9.7%         | 3.6%   | 4.7%   |
| quinoline          | 30 uM            | 90 uM   | 170 uM  | 0.15 mM      | 0.5 mM | 0.9 mM |
|                    | 8.3%             | 3.5%    | 4.5%    | 7.2%         | 5.2%   | 3%     |
| indole             | 30 uM            | 90 uM   | 170 uM  | 0.3 mM       | 0.6 mM | 0.9 mM |
|                    | 6.7%             | 2.8%    | 5.7%    | 9.5%         | 2.3%   | 2.6%   |
| lysine             | 1.5 uM           | 5.5 uM  | 1.7 uM  | 0.25 uM      | 9 uM   | 15 uM  |
|                    | 0.68%            | 1.57%   | 1.99%   | 9.5%         | 5.5%   | 3%     |
| tetracycline       | 3 uM             | 11 uM   | 17 uM   | 3 uM         | 6 uM   | 9 uM   |
|                    | 5.7%             | 4.1%    | 1.9%    | 3.7%         | 5.5%   | 3.3%   |

<sup>a</sup> for each NCOBs, top row presented are the actual concentrations of the NCOBs; and the bottom row presented are the differences in percentage of the calculated values from the calibration curves versus the actual values.

**Table S2.** Comparison of the performance of NCOBs sensing reported in this work to that of prior art.

|    | NCOBs        | LOD <sup>a</sup><br>(this work) <sup>b</sup> | LOD <sup>a</sup><br>(prior art) <sup>c</sup> | Ref. |
|----|--------------|----------------------------------------------|----------------------------------------------|------|
| 1  | butylamine   | 5.50×10 <sup>-2</sup> uM                     | 18 uM                                        | [1]  |
| 2  | spermine     | 0.50 nM                                      | 1.75 nM                                      | [2]  |
| 3  | aniline      | 0.53 nM                                      | 6.8 uM                                       | [3]  |
| 4  | pyrrole      | 0.12 mM                                      | 3.5 uM                                       | [4]  |
| 5  | imidazole    | 74 nM                                        | 2.65 nM                                      | [5]  |
| 6  | pyridine     | 0.68 nM                                      | 0.21 uM                                      | [6]  |
| 7  | purine       | 12.4 uM                                      | 6 uM                                         | [7]  |
| 8  | quinoline    | 15 uM                                        | -                                            | -    |
| 9  | indole       | 25 uM                                        | -                                            | -    |
| 10 | lysine       | 0.20 uM                                      | 19 uM                                        | [8]  |
| 11 | tetracycline | 0.20 uM                                      | 5.6 nM                                       | [9]  |

<sup>a</sup>LOD, limit of detection (3 $\sigma$ ). <sup>b</sup>the results listed here are the best ones achieved in this work from either UV-Vis- or PL-based sensing. <sup>c</sup>only best performance assays found in literature are listed here, which means the work listed here have the lowest LOD among all the work reported.

## References

1. Yang, X.; Wang, Y.; Fu, H.; Wang, W.; Han, D.; An, X. Experimental and theoretical study on the excellent amine-sensing performance of Au decorated WO<sub>3</sub> needle-like nanocomposites. *Mater. Chem. Phys.* **2019**, *234*, 122–132.
2. Bhamore, J.R.; Murthy, Z.; Kailasa, S.K. Fluorescence turn-off detection of spermine in biofluids using pepsin mediated synthesis of gold nanoclusters as a probe. *J. Mol. Liq.* **2019**, *280*, 18–24.
3. Feng, H.-J.; Xu, L.; Liu, B.; Jiao, H. Europium metal–organic frameworks as recyclable and selective turn-off fluorescent sensors for aniline detection. *Dalton Trans.* **2016**, *45*, 17392–17400.
4. Park, S.; Lee, S.-Y. Photoluminescent microrods from the self-assembly of a biomimetic molecule: Application for the optical detection of pyrrole. *Sens. Actuators B.* **2014**, *202*, 690–698.
5. Manshaei, F.; Bagheri, H.; Eshaghi, A. Turn-off chelation-enhanced fluorescence sensing of carbon dot-metallic deep eutectic solvent by imidazole-based small molecules. *Sens. Actuators B* **2021**, *344*, 130228.
6. Ahmed, H.M.; Ghali, M.; Zahra, W.K.; Ayad, M. Optical sensing of pyridine based on green synthesis of passivated carbon dots. *Mater. Today Proc.* **2020**, *33*, 1845–1848.
7. Salve, M.; Amreen, K.; Rajurkar, P.; Pattnaik, P. K.; Goel, S. Miniaturized Disposable Buckypaper-Polymer Substrate Based Electrochemical Purine Sensing Platform. *ECS J. Solid State*

*Sci. Technol.* **2020**, *9*, 101009.

8. Pandey, S.P.; Singh, P.K. A polyelectrolyte based ratiometric optical sensor for arginine and lysine. *Sens. Actuators B* **2020**, *303*, 127182.
9. Velmurugan, S.; Zhi-Xiang, L.; Yang, T. C.; Juan, J. C. Rational design of built-in stannic oxide-copper manganate microrods p-n heterojunction for photoelectrochemical sensing of tetracycline. *Chemosphere* **2021**, *271*, 129788.
